# Supplementary material
Source: ML conference proceedings conference paper supplement (https://proceedings.neurips.cc/paper_files/paper/2010/hash/677e09724f0e2df9b6c000b75b5da10d-Abstract.html)
Supplement: Supplementary file [file 677e09724f0e2df9b6c000b75b5da10d-Supplemental.zip]

---

# Supplementary Material: Learning to combine foveal glimpses with a third-order Boltzmann machine

---

**Hugo Larochelle and Geoffrey Hinton**  
 Department of Computer Science, University of Toronto  
 6 King's College Rd, Toronto, ON, Canada, M5S 3G4  
 {larocheh, hinton}@cs.toronto.edu

## Abstract

We provide here additional details relatively to our paper.

## 1 Reminder of properties of multi-fixation RBM

Here we write down explicitly the main properties of the multi-fixation RBM, specifically the form of its conditional distributions:

$$\begin{aligned}
 p(\mathbf{h}|\mathbf{y}, \mathbf{x}) &= \prod_j p(h_j|\mathbf{y}, \mathbf{x}) \\
 p(h_j = 1|\mathbf{y}, \mathbf{x}_{1:K}) &= \text{sigm}(c_j + \mathbf{U}_j \cdot \mathbf{y} + \sum_{k=1}^K \mathbf{P}_j \cdot \text{diag}(\mathbf{z}(i_k, j_k)) \mathbf{F} \mathbf{x}_k) \\
 p(\mathbf{x}_k|\mathbf{h}) &= \prod_i p(x_{ki}|\mathbf{h}) \quad \forall k \in \{1, \dots, K\} \\
 p(x_{ki} = 1|\mathbf{h}) &= \text{sigm}(b_i + \mathbf{h}^\top \mathbf{P} \text{diag}(\mathbf{z}(i_k, j_k)) \mathbf{F} \cdot_i) \quad \forall k \in \{1, \dots, K\} \\
 p(\mathbf{y} = \mathbf{e}_l|\mathbf{h}) &= \frac{\exp(d_l + \mathbf{h}^\top \mathbf{U} \cdot_l)}{\sum_{l^*=1}^C \exp(d_{l^*} + \mathbf{h}^\top \mathbf{U} \cdot_{l^*})} \\
 p(\mathbf{y} = \mathbf{e}_l|\mathbf{x}_{1:K}) &= \frac{\exp(d_l + \sum_j \text{softplus}(c_j + U_{jl} + \sum_{k=1}^K \mathbf{P}_j \cdot \text{diag}(\mathbf{z}(i_k, j_k)) \mathbf{F} \mathbf{x}_k))}{\sum_{l^*=1}^C \exp(d_{l^*} + \sum_j \text{softplus}(c_j + U_{jl^*} + \sum_{k=1}^K \mathbf{P}_j \cdot \text{diag}(\mathbf{z}(i_k, j_k)) \mathbf{F} \mathbf{x}_k))}
 \end{aligned}$$

where each glimpse  $\mathbf{x}_k$  is a binary vector.

## 2 Detailed description of the hybrid cost gradient

We start with the hybrid cost:

$$\text{Hybrid cost:} \quad \mathcal{C}_{\text{hybrid}} = -\log p(\mathbf{y}^t|\mathbf{x}_{1:K}^t) - \alpha \log p(\mathbf{y}^t, \mathbf{x}_{1:K}^t). \quad (1)$$

The gradient with respect to any parameter  $\theta$  has the following simple form:

$$\begin{aligned}
 \frac{\partial \mathcal{C}_{\text{hybrid}}}{\partial \theta} &= \mathbf{E}_{\mathbf{h}|\mathbf{y}^t, \mathbf{x}_{1:K}^t} \left[ \frac{\partial}{\partial \theta} E(\mathbf{y}^t, \mathbf{x}_{1:K}^t, \mathbf{h}) \right] - \mathbf{E}_{\mathbf{y}, \mathbf{h}|\mathbf{x}_{1:K}^t} \left[ \frac{\partial}{\partial \theta} E(\mathbf{y}, \mathbf{x}_{1:K}^t, \mathbf{h}) \right] \\
 &\quad + \alpha \left( \mathbf{E}_{\mathbf{h}|\mathbf{y}^t, \mathbf{x}_{1:K}^t} \left[ \frac{\partial}{\partial \theta} E(\mathbf{y}^t, \mathbf{x}_{1:K}^t, \mathbf{h}) \right] - \mathbf{E}_{\mathbf{y}, \mathbf{x}_{1:K}^t, \mathbf{h}} \left[ \frac{\partial}{\partial \theta} E(\mathbf{y}, \mathbf{x}_{1:K}^t, \mathbf{h}) \right] \right)
 \end{aligned}$$

---

**Algorithm 1** Gibbs sampling in Contrastive Divergence, to obtain samples  $\mathbf{x}_{1:K}^{\text{neg}}$  and  $\mathbf{y}^{\text{neg}}$  for the multi-fixation RBM, for the hybrid cost

---

**Input:** training pair  $(\mathbf{y}^t, \mathbf{x}_{1:K}^t)$   
 % Notation:  $a \sim p$  means  $a$  is sampled from  $p$   
 $\mathbf{h}^{\text{neg}} \sim p(\mathbf{h}|\mathbf{y}^t, \mathbf{x}_{1:K}^t)$   
 $\mathbf{y}^{\text{neg}} \sim p(\mathbf{y}|\mathbf{h}^{\text{neg}})$   
**for**  $k$  from 1 to  $K$  **do**  
      $\mathbf{x}_k^{\text{neg}} \sim p(\mathbf{x}_k|\mathbf{h}^{\text{neg}})$   
**end for**

---

The expectations with respect to  $\mathbf{h}$  only are tractable. Because  $\mathbf{h}$  is binary and the energy function is linear in  $\mathbf{h}$ , we have that

$$\mathbb{E}_{\mathbf{h}|\mathbf{y}^t, \mathbf{x}_{1:K}^t} \left[ \frac{\partial}{\partial \theta} E(\mathbf{y}^t, \mathbf{x}_{1:K}^t, \mathbf{h}) \right] = \frac{\partial}{\partial \theta} E(\mathbf{y}^t, \mathbf{x}_{1:K}^t, \mathbf{h}(\mathbf{y}^t, \mathbf{x}_{1:K}^t))$$

where we defined

$$\mathbf{h}(\mathbf{y}^t, \mathbf{x}_{1:K}^t) = \text{sigm} \left( \mathbf{c} + \mathbf{U}\mathbf{y}^t + \sum_{k=1}^K \mathbf{P} \text{diag}(\mathbf{z}(i_k, j_k)) \mathbf{F} \mathbf{x}_k^t \right).$$

In other words, the stochastic value of  $\mathbf{h}$  is simply replaced by its expectation given  $\mathbf{y}^t$  and  $\mathbf{x}_{1:K}^t$ .

The expectation with respect to  $\mathbf{y}$  and  $\mathbf{h}$  can also be done exactly:

$$\begin{aligned} \mathbb{E}_{\mathbf{y}, \mathbf{h}|\mathbf{x}_{1:K}^t} \left[ \frac{\partial}{\partial \theta} E(\mathbf{y}, \mathbf{x}_{1:K}^t, \mathbf{h}) \right] &= \mathbb{E}_{\mathbf{y}|\mathbf{x}_{1:K}^t} \left[ \mathbb{E}_{\mathbf{h}|\mathbf{y}, \mathbf{x}_{1:K}^t} \left[ \frac{\partial}{\partial \theta} E(\mathbf{y}, \mathbf{x}_{1:K}^t, \mathbf{h}) \right] \right] \\ &= \mathbb{E}_{\mathbf{y}|\mathbf{x}_{1:K}^t} \left[ \frac{\partial}{\partial \theta} E(\mathbf{y}, \mathbf{x}_{1:K}^t, \mathbf{h}(\mathbf{y}, \mathbf{x}_{1:K}^t)) \right] \\ &= \sum_{\mathbf{y} \in \{\mathbf{e}_l | l \in \{1, \dots, C\}\}} p(\mathbf{y}|\mathbf{x}_{1:K}^t) \frac{\partial}{\partial \theta} E(\mathbf{y}, \mathbf{x}_{1:K}^t, \mathbf{h}(\mathbf{y}, \mathbf{x}_{1:K}^t)) \end{aligned}$$

where  $C$  is the number of classes, and  $p(\mathbf{y}|\mathbf{x}_{1:K}^t)$  can be computed tractably.

However, the expectation with respect to  $\mathbf{y}$ ,  $\mathbf{x}_{1:K}$  and  $\mathbf{h}$  is intractable. Contrastive Divergence provides a good approximation however, by replacing the expectation over the input units  $\mathbf{x}_{1:K}$  with a point estimate at a sample  $\mathbf{x}_{1:K}^{\text{neg}}$ . We also replace the expectation over  $\mathbf{y}$  by a point estimate at a sample  $\mathbf{y}^{\text{neg}}$  (while not necessary, it is more efficient to do so):

$$\begin{aligned} \mathbb{E}_{\mathbf{y}, \mathbf{x}_{1:K}, \mathbf{h}} \left[ \frac{\partial}{\partial \theta} E(\mathbf{y}, \mathbf{x}_{1:K}, \mathbf{h}) \right] &= \mathbb{E}_{\mathbf{y}, \mathbf{x}_{1:K}} \left[ \mathbb{E}_{\mathbf{h}|\mathbf{y}, \mathbf{x}_{1:K}} \left[ \frac{\partial}{\partial \theta} E(\mathbf{h}|\mathbf{y}, \mathbf{x}_{1:K}) \right] \right] \\ &= \mathbb{E}_{\mathbf{h}|\mathbf{y}^{\text{neg}}, \mathbf{x}_{1:K}^{\text{neg}}} \left[ \frac{\partial}{\partial \theta} E(\mathbf{y}^{\text{neg}}, \mathbf{x}_{1:K}^{\text{neg}}, \mathbf{h}) \right] \\ &= \frac{\partial}{\partial \theta} E(\mathbf{y}^{\text{neg}}, \mathbf{x}_{1:K}^{\text{neg}}, \mathbf{h}(\mathbf{y}^{\text{neg}}, \mathbf{x}_{1:K}^{\text{neg}})) \end{aligned}$$

In Contrastive Divergence, the samples  $\mathbf{x}_{1:K}^{\text{neg}}$  and  $\mathbf{y}^{\text{neg}}$  are obtained by running a brief MCMC chain, initialized at the training data observation  $\mathbf{x}_{1:K}^t$  and  $\mathbf{y}^t$ . In particular, we use one step of Gibbs sampling, first sampling a value of  $\mathbf{h}^{\text{neg}}$  for  $\mathbf{h}$  given  $\mathbf{x}_{1:K}^t$ , and then sampling a new value for all glimpses  $\mathbf{x}_{1:K}^{\text{neg}}$  and for the target  $\mathbf{y}^{\text{neg}}$  given  $\mathbf{h}^{\text{neg}}$ . Algorithm 1 gives a pseudocode of this sampling procedure.

---

**Algorithm 2** Gibbs sampling in Contrastive Divergence, to obtain samples  $\mathbf{x}_{1:k}^{\text{neg}}$  and  $\mathbf{y}^{\text{neg}}$  for the multi-fixation RBM, for the  $k^{\text{th}}$  term of the hybrid-sequential cost

---

**Input:** training pair  $(\mathbf{y}^t, \mathbf{x}_{1:k}^t)$   
 % Notation:  $a \sim p$  means  $a$  is sampled from  $p$   
 $\mathbf{h}^{\text{neg}} \sim p(\mathbf{h}|\mathbf{y}^t, \mathbf{x}_{1:k}^t)$   
 $\mathbf{y}^{\text{neg}} \sim p(\mathbf{y}|\mathbf{h}^{\text{neg}})$   
 $\mathbf{x}_k^{\text{neg}} \sim p(\mathbf{x}_k|\mathbf{h}^{\text{neg}})$

---

All that is left to derive are the gradients of the energy function with respect to all parameters, which are simply:

$$\begin{aligned} \frac{\partial}{\partial d_{l^*}} E(\mathbf{y}, \mathbf{x}_{1:K}, \mathbf{h}) &= -y_{l^*} \\ \frac{\partial}{\partial c_j} E(\mathbf{y}, \mathbf{x}_{1:K}, \mathbf{h}) &= -h_j \\ \frac{\partial}{\partial b_i} E(\mathbf{y}, \mathbf{x}_{1:K}, \mathbf{h}) &= -\sum_{k=1}^K x_{ki} \\ \frac{\partial}{\partial U_{j^*}} E(\mathbf{y}, \mathbf{x}_{1:K}, \mathbf{h}) &= -h_j y_{l^*} \\ \frac{\partial}{\partial F_{ji}} E(\mathbf{y}, \mathbf{x}_{1:K}, \mathbf{h}) &= -h_j \sum_{k=1}^K z(i_k, j_k)_i \mathbf{F}_i \cdot \mathbf{x}_k \\ \frac{\partial}{\partial F_{ji}} E(\mathbf{y}, \mathbf{x}_{1:K}, \mathbf{h}) &= -\mathbf{h}^\top \sum_{k=1}^K \mathbf{P}_{.j} z(i_k, j_k)_j x_{ki} \\ \frac{\partial}{\partial \bar{z}(i_k, j_k)_a} E(\mathbf{y}, \mathbf{x}_{1:K}, \mathbf{h}) &= -(\mathbf{h}^\top \mathbf{P}_{.a}) z(i_k, j_k)_a (1 - z(i_k, j_k)_a) (\mathbf{F}_a \cdot \mathbf{x}_k) \end{aligned}$$

### 3 Detailed description of the hybrid-sequential cost gradient

We now move to the hybrid-sequential cost:

$$\textbf{Hybrid-sequential cost: } \mathcal{C}_{\text{hybrid-seq}} = \sum_{k=1}^K -\log p(\mathbf{y}^t | \mathbf{x}_{1:k}^t) - \alpha \log p(\mathbf{y}^t, \mathbf{x}_k^t | \mathbf{x}_{1:k-1}^t)$$

It has the following gradient:

$$\begin{aligned} \frac{\partial \mathcal{C}_{\text{hybrid-seq}}}{\partial \theta} &= \sum_{k=1}^K \left\{ \mathbb{E}_{\mathbf{h}|\mathbf{y}^t, \mathbf{x}_{1:k}^t} \left[ \frac{\partial}{\partial \theta} E(\mathbf{y}^t, \mathbf{x}_{1:k}^t, \mathbf{h}) \right] - \mathbb{E}_{\mathbf{y}, \mathbf{h}|\mathbf{x}_{1:k}^t} \left[ \frac{\partial}{\partial \theta} E(\mathbf{y}, \mathbf{x}_{1:k}^t, \mathbf{h}) \right] \right. \\ &\quad \left. + \alpha \left( \mathbb{E}_{\mathbf{h}|\mathbf{y}^t, \mathbf{x}_{1:k}^t} \left[ \frac{\partial}{\partial \theta} E(\mathbf{y}^t, \mathbf{x}_{1:k}^t, \mathbf{h}) \right] - \mathbb{E}_{\mathbf{y}, \mathbf{x}_k, \mathbf{h}|\mathbf{x}_{1:k-1}^t} \left[ \frac{\partial}{\partial \theta} E(\mathbf{y}, \mathbf{x}_{1:k}^t, \mathbf{h}) \right] \right) \right\} \quad (2) \end{aligned}$$

The expectations with respect to  $\mathbf{h}$  only and with respect to  $\mathbf{h}$  and  $\mathbf{y}$  are still tractable. The only difference is that we have  $K$  such expectations, one for every subsequence  $\mathbf{x}_{1:k}$  where  $k \in 1, \dots, K$ . Hence, the formulas of the previous section still apply, the only difference being that the number of glimpses  $k$  changes in the visible layer.

As for the expectations with respect to  $\mathbf{y}$ ,  $\mathbf{x}_k$  and  $\mathbf{h}$ , it is intractable but Contrastive Divergence can also be used, much like for the expectations with respect to  $\mathbf{h}$ ,  $\mathbf{y}$  and  $\mathbf{x}_{1:K}$  in the previous section. The only difference is that a sample  $\mathbf{x}_k^{\text{neg}}$  for the  $k^{\text{th}}$  glimpse only is needed, instead of for the whole sequence of glimpses, since we are conditioning on the previous glimpses  $\mathbf{x}_{1:k-1}$ . Algorithm 2 gives a pseudo-code for sampling  $\mathbf{x}_k^{\text{neg}}$ .

The training update for the hybrid-sequential cost can just proceed sequentially. For  $k = 1$  to  $K$ , the  $k^{\text{th}}$  glimpse  $\mathbf{x}_k$  is obtained and then gradients for the corresponding  $k^{\text{th}}$  group of terms in the

summation of Equation 2 are estimated and accumulated. Once all gradients have been accumulated, the multi-fixation RBM is updated by a gradient step.
